# Supplementary material for: Differences between co-cultures and monocultures in testing the toxicity of particulate matter derived from log wood and pellet combustion
Source: PubMed Central journal article supplement (PMC5821343; doi:10.1371/journal.pone.0192453), 2018-02-21
Supplement: pone.0192453.s003.pdf [file pone.0192453.s003.pdf]

|                                 | Birch | Beech | Spruce | Pellet |
|---------------------------------|-------|-------|--------|--------|
| Naphthalene                     | 2.1   | bdl   | 0.3    | 0.2    |
| Acenaphthylene                  | 4.3   | 2.7   | 0.5    | bdl    |
| Acenaphthene                    | bdl   | bdl   | bdl    | bdl    |
| Fluorene                        | 5.8   | 5.6   | 1.6    | bdl    |
| Phenanthrene                    | 156.9 | 151.9 | 77.6   | 1.4    |
| Anthracene                      | 7.7   | 14.6  | 8.2    | bdl    |
| Pyrene                          | 56.9  | 125.4 | 174.1  | 6.0    |
| 1-Methylphenanthrene            | 12.9  | 9.3   | 22.4   | 0.1    |
| Fluoranthene                    | 75.9  | 145.8 | 200.9  | 5.2    |
| Benzo[c]phenanthrene            | 5.5   | 13.9  | 31.9   | 1.1    |
| Benzo[a]anthracene              | 4.3   | 16.9  | 87.9   | 1.6    |
| Cyclopenta[c,d]pyrene           | 2.0   | 14.1  | 39.4   | 1.3    |
| Triphenylene                    | 2.8   | 9.2   | 24.5   | bdl    |
| Chrysene                        | 7.4   | 17.7  | 80.0   | 2.7    |
| 5-Methylchrysene                | bdl   | 0.4   | 0.8    | bdl    |
| Benzo[b]fluoranthene            | 5.3   | 25.4  | 101.9  | 1.0    |
| Benzo[k]fluoranthene            | bdl   | bdl   | bdl    | 0.2    |
| Benzo[j]fluoranthene            | 3.8   | 20.0  | 67.0   | 0.7    |
| Benzo[e]pyrene                  | 4.9   | 21.1  | 62.1   | 1.1    |
| Benzo[a]pyrene                  | 2.3   | 18.7  | 82.4   | 0.4    |
| Perylene                        | 0.6   | 3.5   | 13.1   | bdl    |
| Indeno[1,2,3-cd]pyrene          | 0.4   | 5.1   | 58.5   | bdl    |
| Dibenzo[a,h]anthracene          | bdl   | bdl   | 9.5    | bdl    |
| Benzo[g,h,i]perylene            | 1.0   | 7.8   | 63.4   | 0.3    |
| Anthanthrene                    | bdl   | bdl   | 14.4   | bdl    |
| Dibenzo[a,l]pyrene              | bdl   | bdl   | 1.1    | bdl    |
| Dibenzo[a,e]pyrene              | bdl   | bdl   | 7.0    | 1.4    |
| Coronene                        | bdl   | bdl   | 30.8   | bdl    |
| Dibenzo[a,i]pyrene              | bdl   | bdl   | bdl    | bdl    |
| Dibenzo[a,h]pyrene              | bdl   | bdl   | bdl    | bdl    |
| 2-/8-Methylfluoranthene         | bd    | 2.9   | 9.8    | bdl    |
| 1-/3-/7-Methylfluoranthene      | 1.6   | 6.0   | 17.1   | bdl    |
| 4-Methylpyrene                  | bdl   | 2.2   | 7.4    | bdl    |
| 2-Methylpyrene                  | 0.9   | 2.9   | 8.7    | bdl    |
| 1-Methylpyrene                  | 0.8   | 2.9   | 9.1    | bdl    |
| 7,12-Dimethyl-Benz[a]anthracene | 4.2   | 4.8   | bdl    | bdl    |
| 9-Methylphenanthrene            | 3.7   | 4.4   | 2.4    | bdl    |
| 2,6-Dimethoxybenzoquinone       | 37.3  | 83.5  | bdl    | bdl    |
| 9H-Fluoren-9-one                | 47.0  | 44.2  | 13.3   | bdl    |
| 1H-Phenalen-1-one               | 29.9  | 47.2  | 61.7   | 0.6    |
| Xanthone                        | 5.4   | 5.5   | 4.4    | bdl    |
| 9,10-Anthracenedione            | 15.2  | 17.6  | 26.6   | bdl    |
| Cyclopenta(def)phenanthrenone   | 19.3  | 28.3  | 31.0   | 0.7    |
| 1,8-Naphthalic anhydride        | 58.0  | 158.0 | 246.0  | bdl    |
| 2,3-5,6-Dibenzoxalene           | 2.3   | 4.3   | 11.4   | bdl    |

|                                  |      |      |      |     |
|----------------------------------|------|------|------|-----|
| Benzo[b]naphtho[2,3-d]furan      | 1.0  | 2.3  | 9.7  | bdl |
| Benzo[kl]xanthene                | 1.2  | 3.9  | 11.5 | bdl |
| 11H-Benzo[a]fluoren-11-one       | 1.8  | 4.1  | 17.1 | bdl |
| 4-Oxapyrene-5-one                | 3.6  | 5.3  | 11.0 | ndl |
| 7H-Benzo[c]fluorene-7-one        | 1.1  | 2.1  | 7.7  | bdl |
| 11H-Benzo[b]fluoren-11-one       | 1.8  | 5.0  | 21.6 | bdl |
| 7H-Benz[de]anthracen-7-one       | 3.9  | 11.6 | 43.1 | bdl |
| Naphtho[2,1,8,7-klmn]xanthene    | bdl  | 1.2  | 3.2  | bdl |
| Benz[a]anthracene-7,12-dione     | bdl  | 1.2  | 5.5  | bdl |
| 5,12-Naphthacenedione            | bdl  | bdl  | 2.5  | bdl |
| Phenanthro[3,4-c]furan-1,3-dione | bdl  | 2.1  | 8.7  | bdl |
| 6H-Benzo[cd]pyren-6-on           | 3.0  | 16.3 | 60.3 | bdl |
| Tetradecane                      | 3.5  | bdl  | bdl  | bdl |
| Pentadecane                      | bdl  | bdl  | bdl  | bdl |
| Hexadecane                       | 9.7  | 7.1  | bdl  | bdl |
| Heptadecane                      | 10.9 | 8.0  | 1.5  | bdl |
| Octadecane                       | 8.8  | 6.6  | bdl  | bdl |
| Nonadecane                       | 5.5  | 5.5  | 2.9  | 1.5 |
| Eicosane                         | 13.7 | 8.1  | 12.7 | 4.0 |
| Heneicosane                      | 3.2  | 4.0  | 5.4  | 1.2 |
| Docosane                         | 8.1  | 4.6  | 10.7 | 4.9 |
| Tricosane                        | 1.5  | 4.5  | 11.6 | 1.8 |
| Tetracosane                      | 5.1  | 4.9  | 10.8 | 3.0 |
| Pentacosane                      | 0.9  | bdl  | 5.7  | 1.2 |
| Hexacosane                       | 3.2  | 1.1  | 6.8  | 1.4 |
| Heptacosane                      | 3.0  | bdl  | 5.4  | 3.8 |
| Octacosane                       | 2.4  | 1.4  | 5.3  | 1.7 |
| Nonacosane                       | 7.3  | 1.1  | 3.2  | 4.3 |
| Triacotane                       | bdl  | 0.8  | 2.2  | 1.0 |
| Hentriacotane                    | bdl  | 0.3  | 0.6  | 0.7 |
| Dotriacotane                     | bdl  | bdl  | 0.8  | 0.4 |
| Tritriacotane                    | 3.2  | bdl  | 2.4  | 1.6 |
